# Supplementary material for: CD70 as an actionable immunotherapeutic target in recurrent glioblastoma and its microenvironment
Source: PubMed Central journal article supplement — J Immunother Cancer. 2022 Jan 11;10(1):e003289. doi: 10.1136/jitc-2021-003289 (PMC8753449; doi:10.1136/jitc-2021-003289), 2022-01-11

**Supplementary Figure Legends:****Supp Figure 1: CD70 expression on in-house primary and recurrent GBM samples.**

**A.** Manhattan plot of the top upregulated RNAseq genes in patient-derived GBM brain tumor initiating cells (GBM CSCs) BT698 (rGBM), BT956 (pGBM), BT618 (rGBM), compared to the publicly available TCGA database, identified CD70 (circled in red) as a target candidate upregulated in the CSC subpopulation, compared to tumor bulk. **B:** CD70 cell surface protein expression, assessed by flow cytometry cell surface staining on multiple in-house primary and recurrent cell lines, as well as normal human cell lines.

**Supp Figure 2: In silico analyses of CD70 expression in publicly-available glioma transcriptomic datasets.**

A: CD70 mRNA expression in the Chinese Glioma Genome Atlas (CGGA), stratified by primary, recurrent or secondary tumor. Boxes indicate 25th, 50th and 75th percentile while the whiskers extend to 1.4 times the IQR; P values <0.05 from unpaired T tests are as follows: primary-recurrent P = 1.3e-05. B-C, Kaplan-Meier survival analysis of glioma patients stratified by median CD70 expression from B: CGGA and C. the Cancer Genome Atlas (TCGA). P value from log-rank (Mantel-Cox) test. D: CD70 mRNA expression in the Ivy GAP, stratified by tumor cell location. Boxes indicate 25th, 50th and 75th percentile while the whiskers extend to 1.4 times the IQR; P values <0.05 from unpaired T tests are as follows: pseudopalisading cells compared to cellular tumor (P = 2.1e-05), infiltrating tumor (P = 8.3e-05), leading edge (P = 7.5e-05), and microvascular proliferation (P = 2.4e-03). E: CD70 mRNA expression in the CGGA (left) and TCGA (right), stratified by gender. Boxes indicate 25th, 50th and 75th percentile while the whiskers extend to 1.4 times the IQR; P values from unpaired T tests on plot. F: CD70 mRNA expression in the CGGA, stratified by WHO grade and age status. Boxes indicate 25th, 50th and 75th percentile while the whiskers extend to 1.4 times the IQR; P values from unpaired T tests on plot.

**Supp Figure 3: Knockdown of CD70 improves survival *in vivo*.**

**A:** Proliferation of sorted CD70-positive and -negative cells from BT698, BT428, BT458 GBM cultures was assessed using a PrestoBlue assay. **B:** Proliferation of GBM8 cultures transduced with shCD70-1, shCD70-2 or shGFP was assessed using a PrestoBlue assay. **C:** Limiting Dilution Analysis of BT241 that was knocked out for CD70 (cr-CD70A and cr-CD70B) or control crAAVS-1.

**D.** Tumor area from animal-engrafted tumors of shCD70 GBM4 cells compared to control. **E:** *Kaplan-Meier* curve displaying survival of mice engrafted with shCD70 GBM4 cells compared to shGFP GBM4 controls.

**Supplementary Figure 4: CD70 influence on the MES subtype and associated machinery.**

**A, B:** RNA sequencing of CD70 silenced GBM CSC cells BT241, GBM8 and GBM4 permitted the gene set enrichment analysis (GSEA) (A) and Cytoscape Node map (B) depicting circuitries under CD70 dependence.

**Supp Figure 5: Generation and *in vitro* Characterization of CD70-Specific CAR-T Cells.**

**A:** Internalization studies showing Fab presence on the surface of BT241 cells after a 2 hour incubation. **B, C:** IFN-gamma and TNF-alpha release during coculture of CD70 CAR-T or ConCAR with GBM CSCs lines GBM4, GBM8, or BT935 CD70 CAR-T, at effector to target (E:T) ratios of 1:1, as analyzed by ELISA (n=3). **D:** Cytotoxicity assay assessing the killing capacity of CD70CAR-T cells on GBM8 CSCs compared to control, after co-culturing for 24 hours, as tested at various E:T ratios (n=3).

**Supp Figure 6: CD70 CAR-Ts are efficacious against recurrent GBM8 cells *in vivo*.**

NSG mice (at least n=6 per group) were intracranially implanted with 100,000 human GBM8 flLuc GBM cells. Upon successful engraftment, mice were treated with  $1 \times 10^6$  CD70CAR-T or ConCAR-T cells, delivered intracranially once a week for two weeks. **A:** CAR-T treated mice a lower tumor burden in the CD70 CAR-T group compared to Control group as by IVIS imaging. **B:** CD70CAR-T treated mice also showed higher survival rate compared to that of the ConCAR-T cohort. **C:** Tumor burden was assessed in the CD70 CAR-T group compared to Control group, as measured using formalin-fixed, H&E stained mouse brain slices (representative picture on the right).

**Supp Figure 7: Modelling CD70s influence on the GBM TIME.**

**A.** Viability of CD3+ or CD3+CD27+ cells were assessed after co-culture with cells only or supernatant only from i) control knockdown BT241 cells; ii) one of two constructs that produce CD70KD BT241 cells. **B.** Tumor immune microenvironment (TIME) cells extracted from patient tumor samples were analyzed by flow cytometry, evaluating the pattern of expression of CD27 in non-lymphoid cells (CD45+CD3+) as well as cytotoxic T cell infiltration (CD8+ in CD45+CD3+).

**Supp Figure 8: CD70 and CD27 expression in non-malignant tissue.** **A.** Cell-type annotated UMAP of Cao 2020 scRNAseq data (top) and expression of CD70 (middle) and CD27 (bottom) visualized on UMAP and stratified by cell type. **B.** Cell-type annotated UMAP of Zeisel 2018 scRNAseq data (left) and expression of CD70 (top right) and CD27 (bottom right) visualized on UMAP and stratified by cell type. Expr; Expression.

**A**

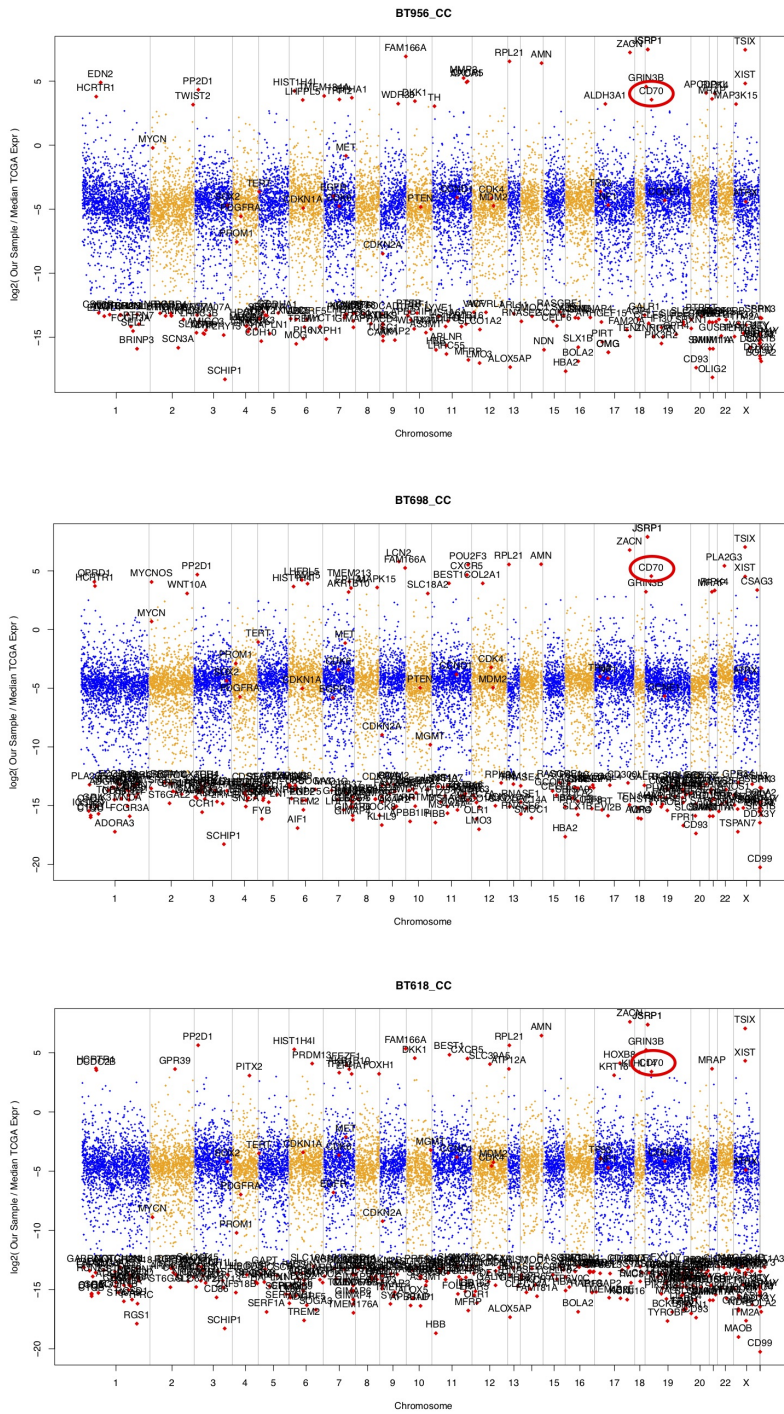

**B**

| Patient derived BTIC lines | %CD70+ cells |
|----------------------------|--------------|
| BT241                      | 94           |
| MBT190                     | 69           |
| MBT225                     | 68           |
| BT618                      | 46           |
| MBT173                     | 41           |
| BT972                      | 11.3         |
| SB2b                       | 4            |
| BT566                      | 3            |
| GBM4                       | 72           |
| GBM8                       | 70           |
| BT698                      | 65           |
| RN1                        | 35           |
| MBT103                     | 35           |
| MBT121                     | 12           |
| BT458                      | 9            |
| BT428                      | 5            |
| BT954                      | 4            |
| WK1                        | 3            |
| BT799                      | 2.2          |
| GBM123                     | 1.5          |
| MBT63                      | 1.3          |
| BT935                      | <1           |
| BT594                      | 0.5          |
| BT459                      | <1           |
| BT778                      | <1           |
| NSC195                     | 1.8          |
| NSC201FT                   | 8.5          |
| NSC198                     | 0.12         |
| Astrocytes                 | 1.2          |

Recurrent

Primary

Normal brain cells

**Sup Figure 1**

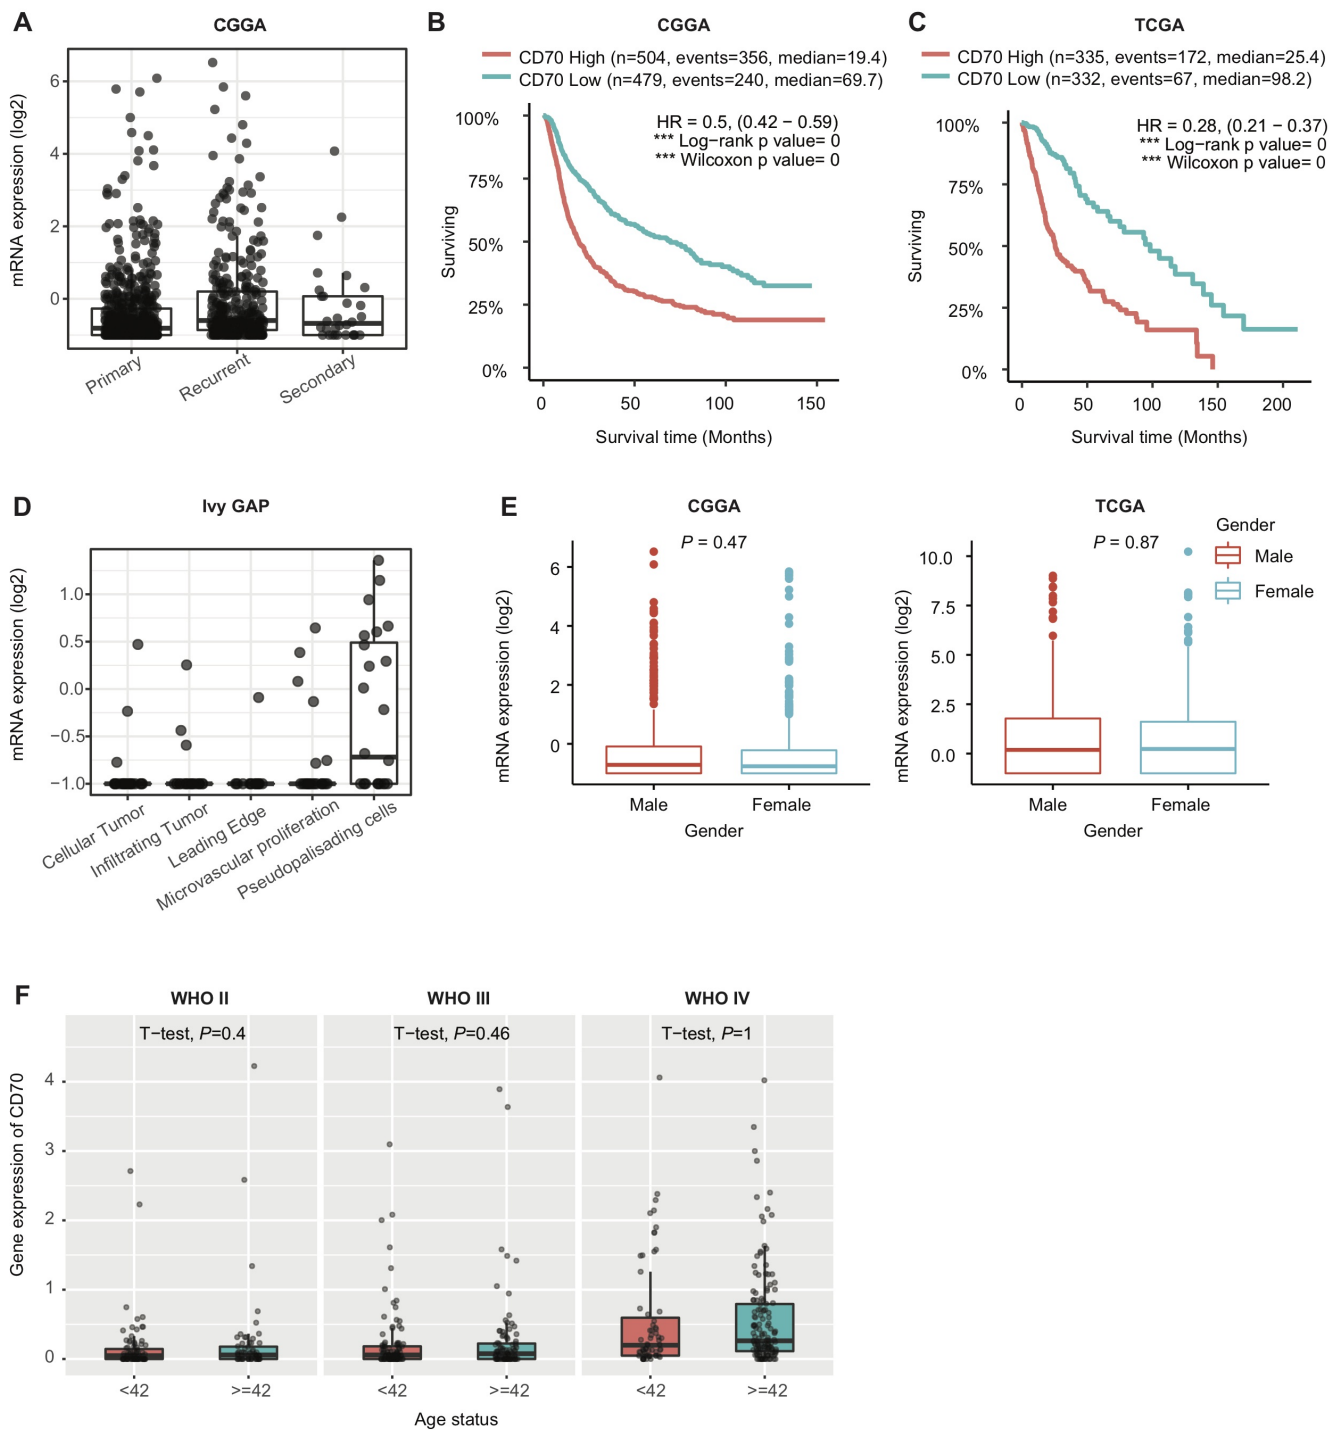

Sup Figure 2

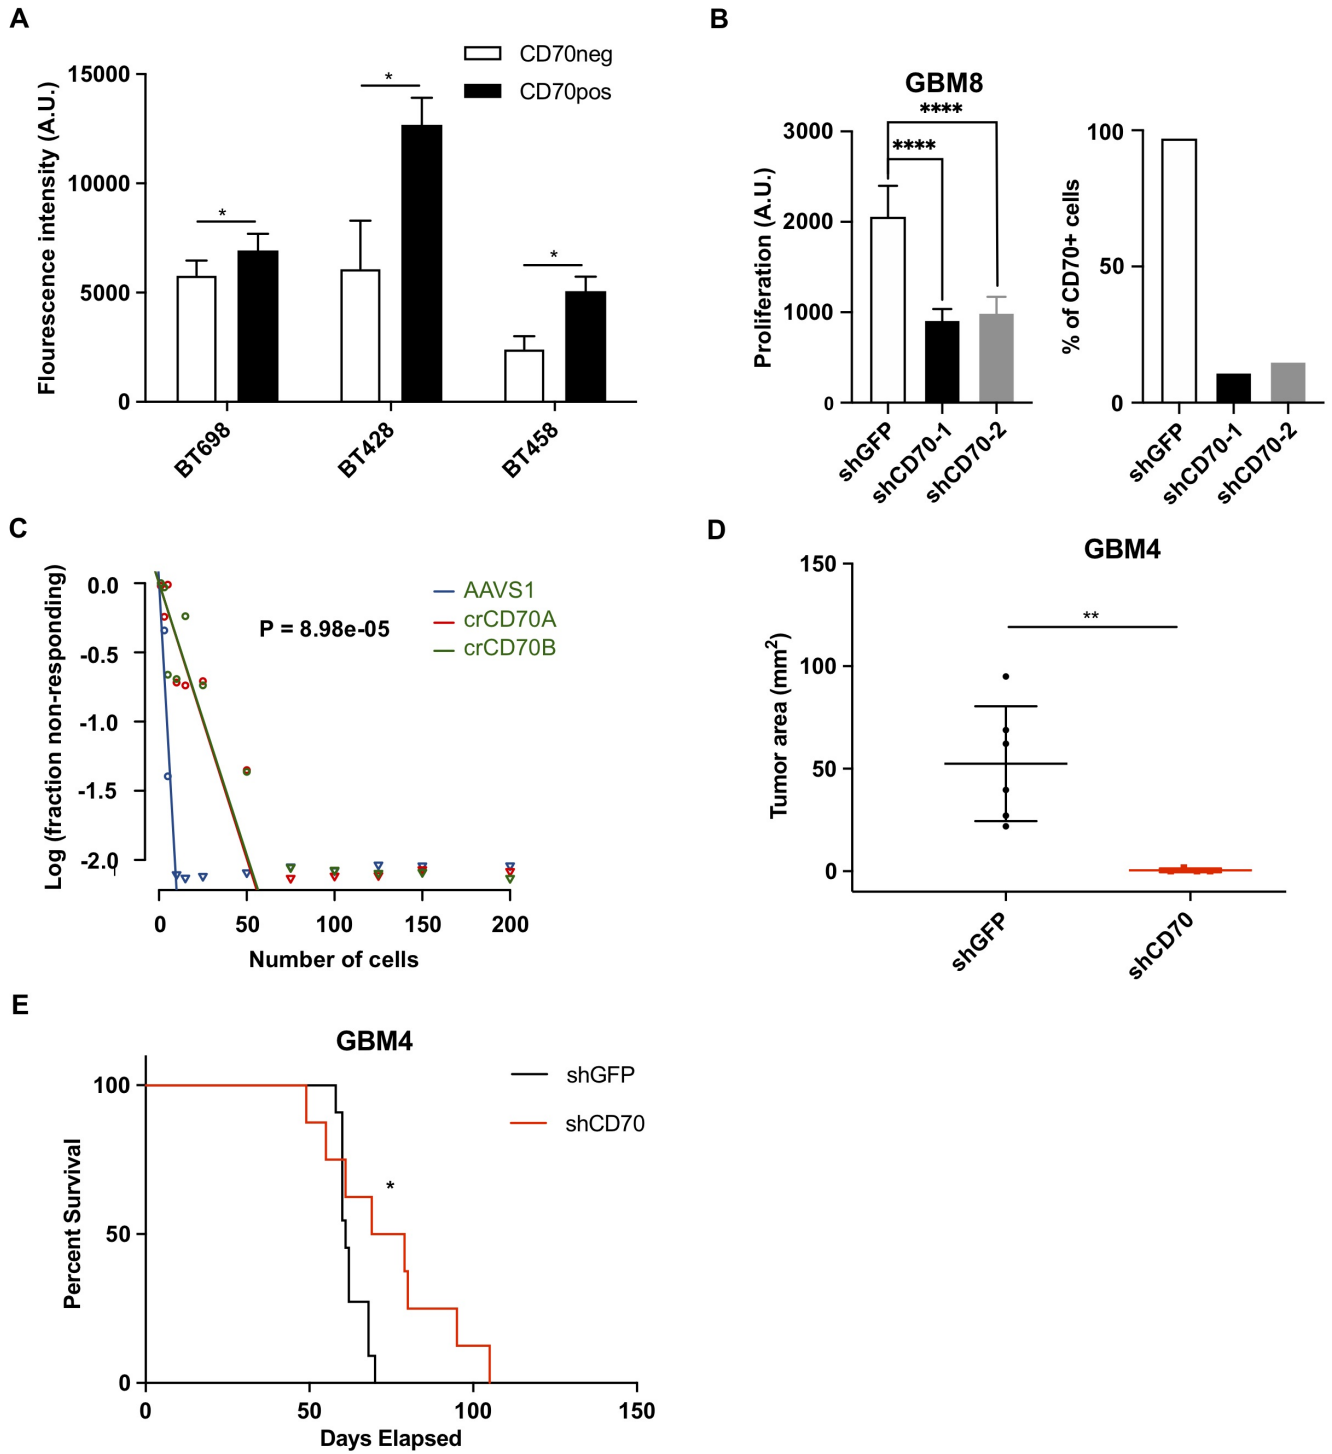

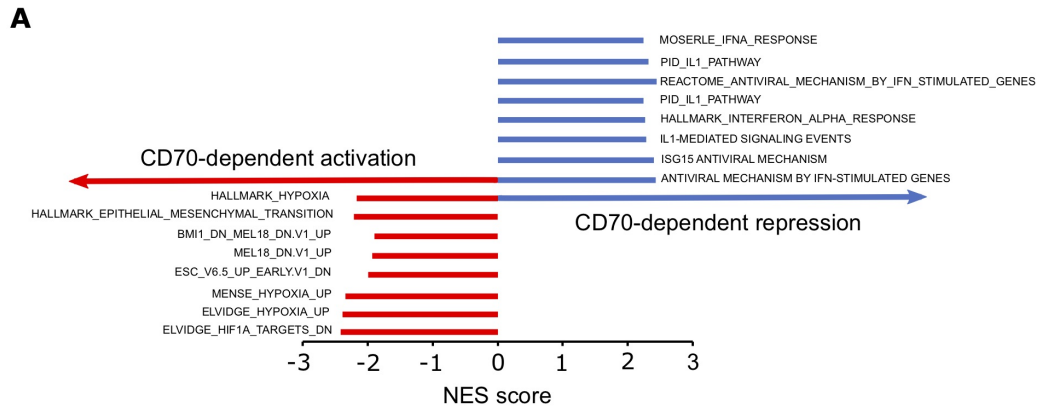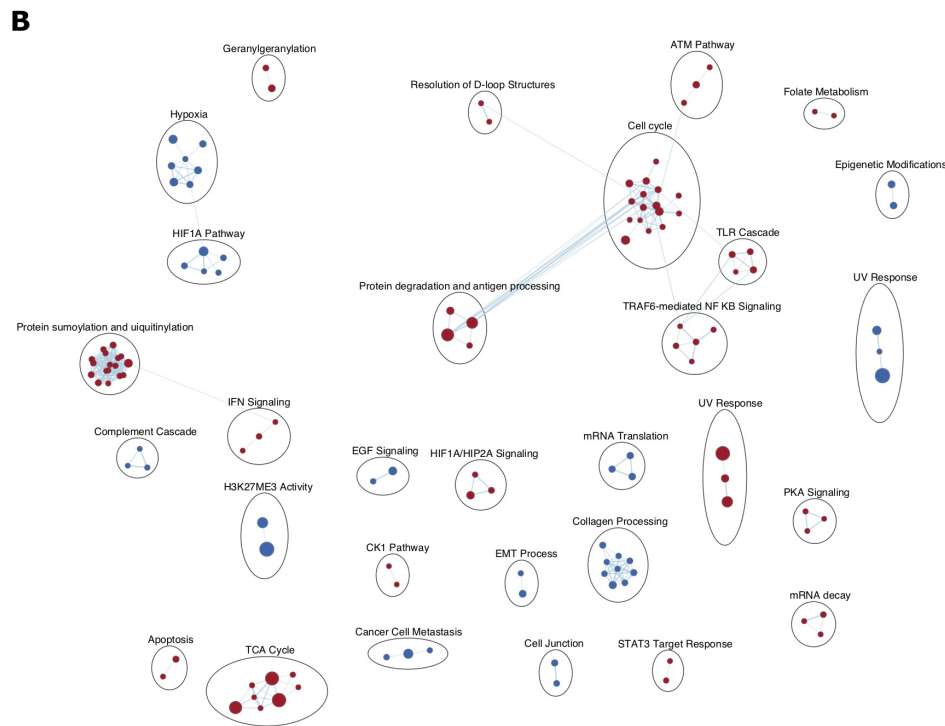

**Sup Figure 4**

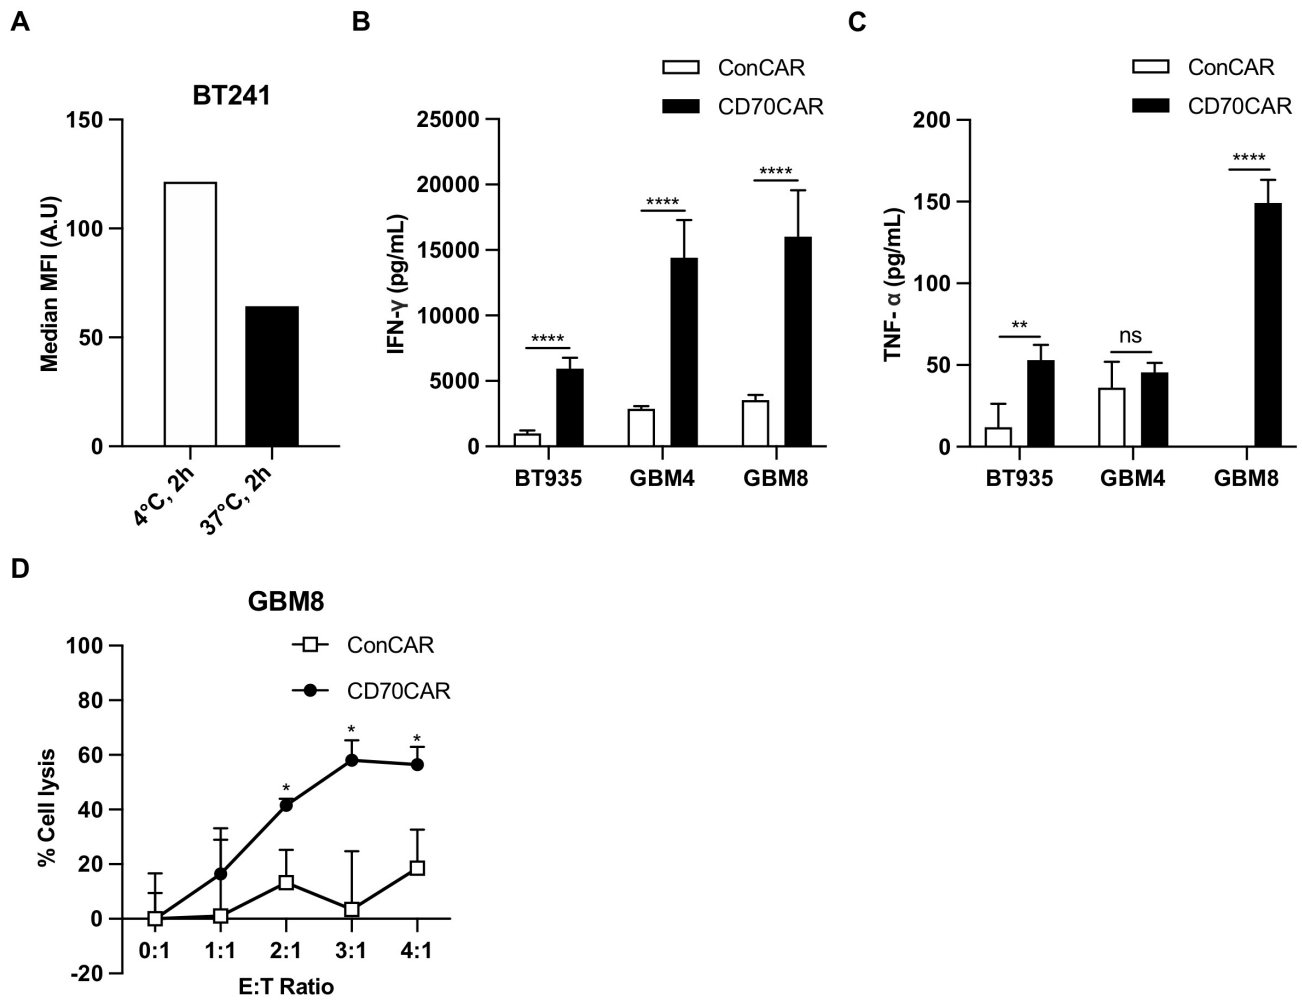

Sup Figure 5



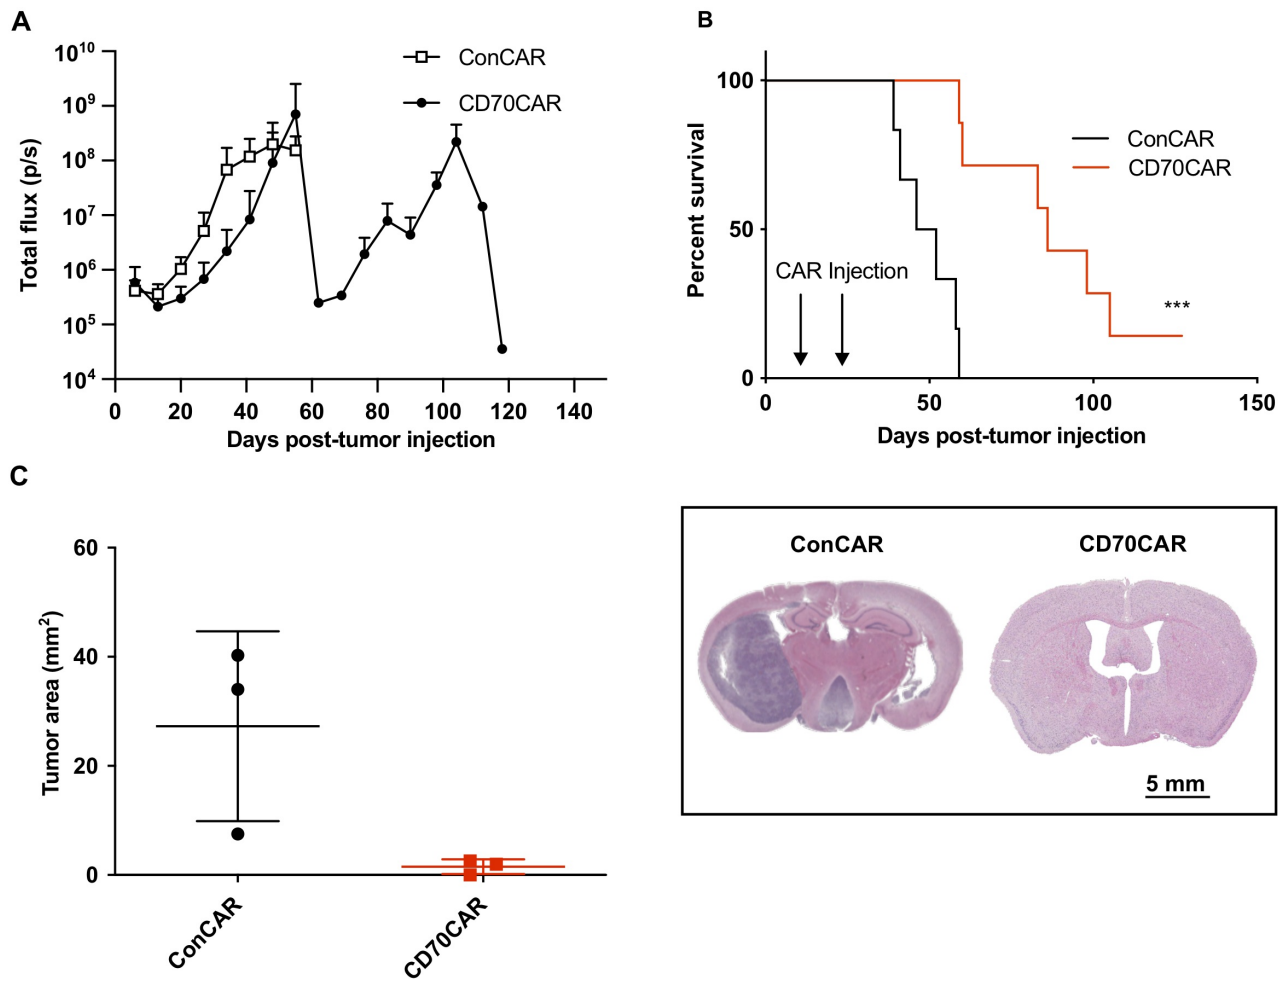

Sup Figure 6

A

| Experimental setup                     | %CD3+ | %CD3+/CD27+ |
|----------------------------------------|-------|-------------|
| T cells alone                          | 84    | 78          |
| T cells + BT241 crAAVS1 (supernatant)  | 76    | 78          |
| T cells + BT241 crCD70-A (supernatant) | 76    | 78          |
| T cells + BT241 crCD70-B (supernatant) | 78    | 78          |
| T cells + BT241 crAAVS1 (cells)        | 77    | 43          |
| T cells + BT241 crCD70-A (cells)       | 77    | 79          |
| T cells + BT241 crCD70-B (cells)       | 80    | 76          |

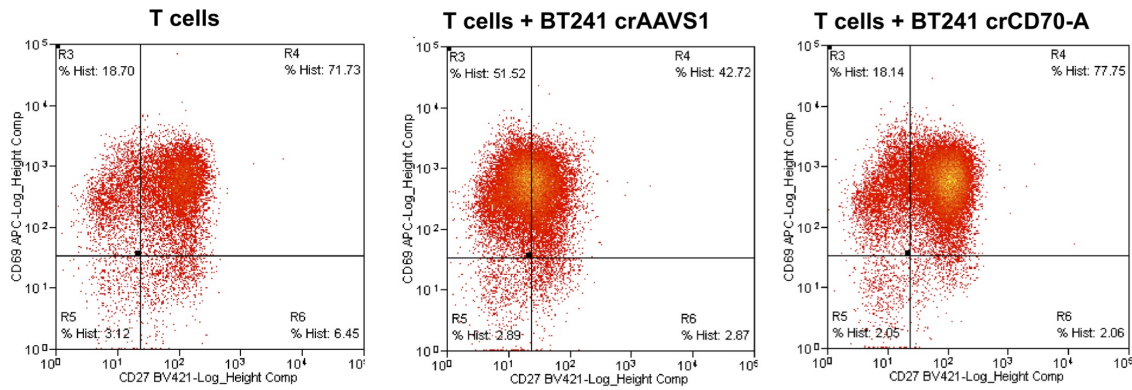

B

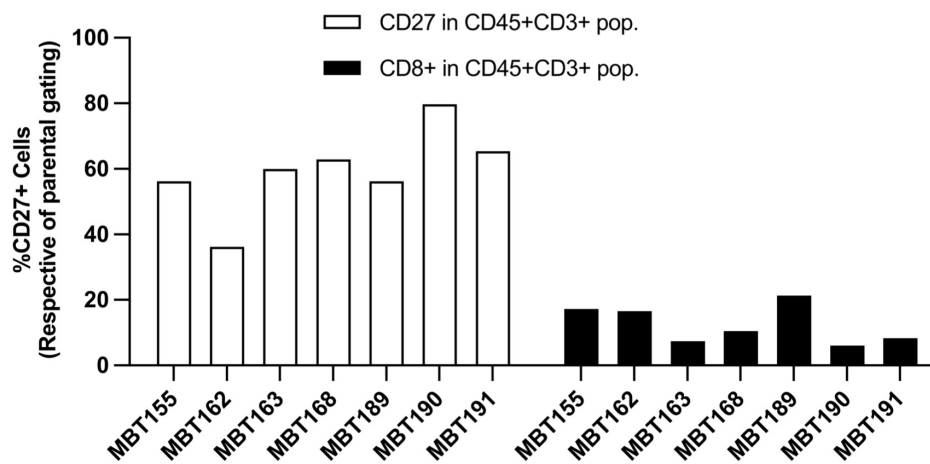

Sup Figure 7

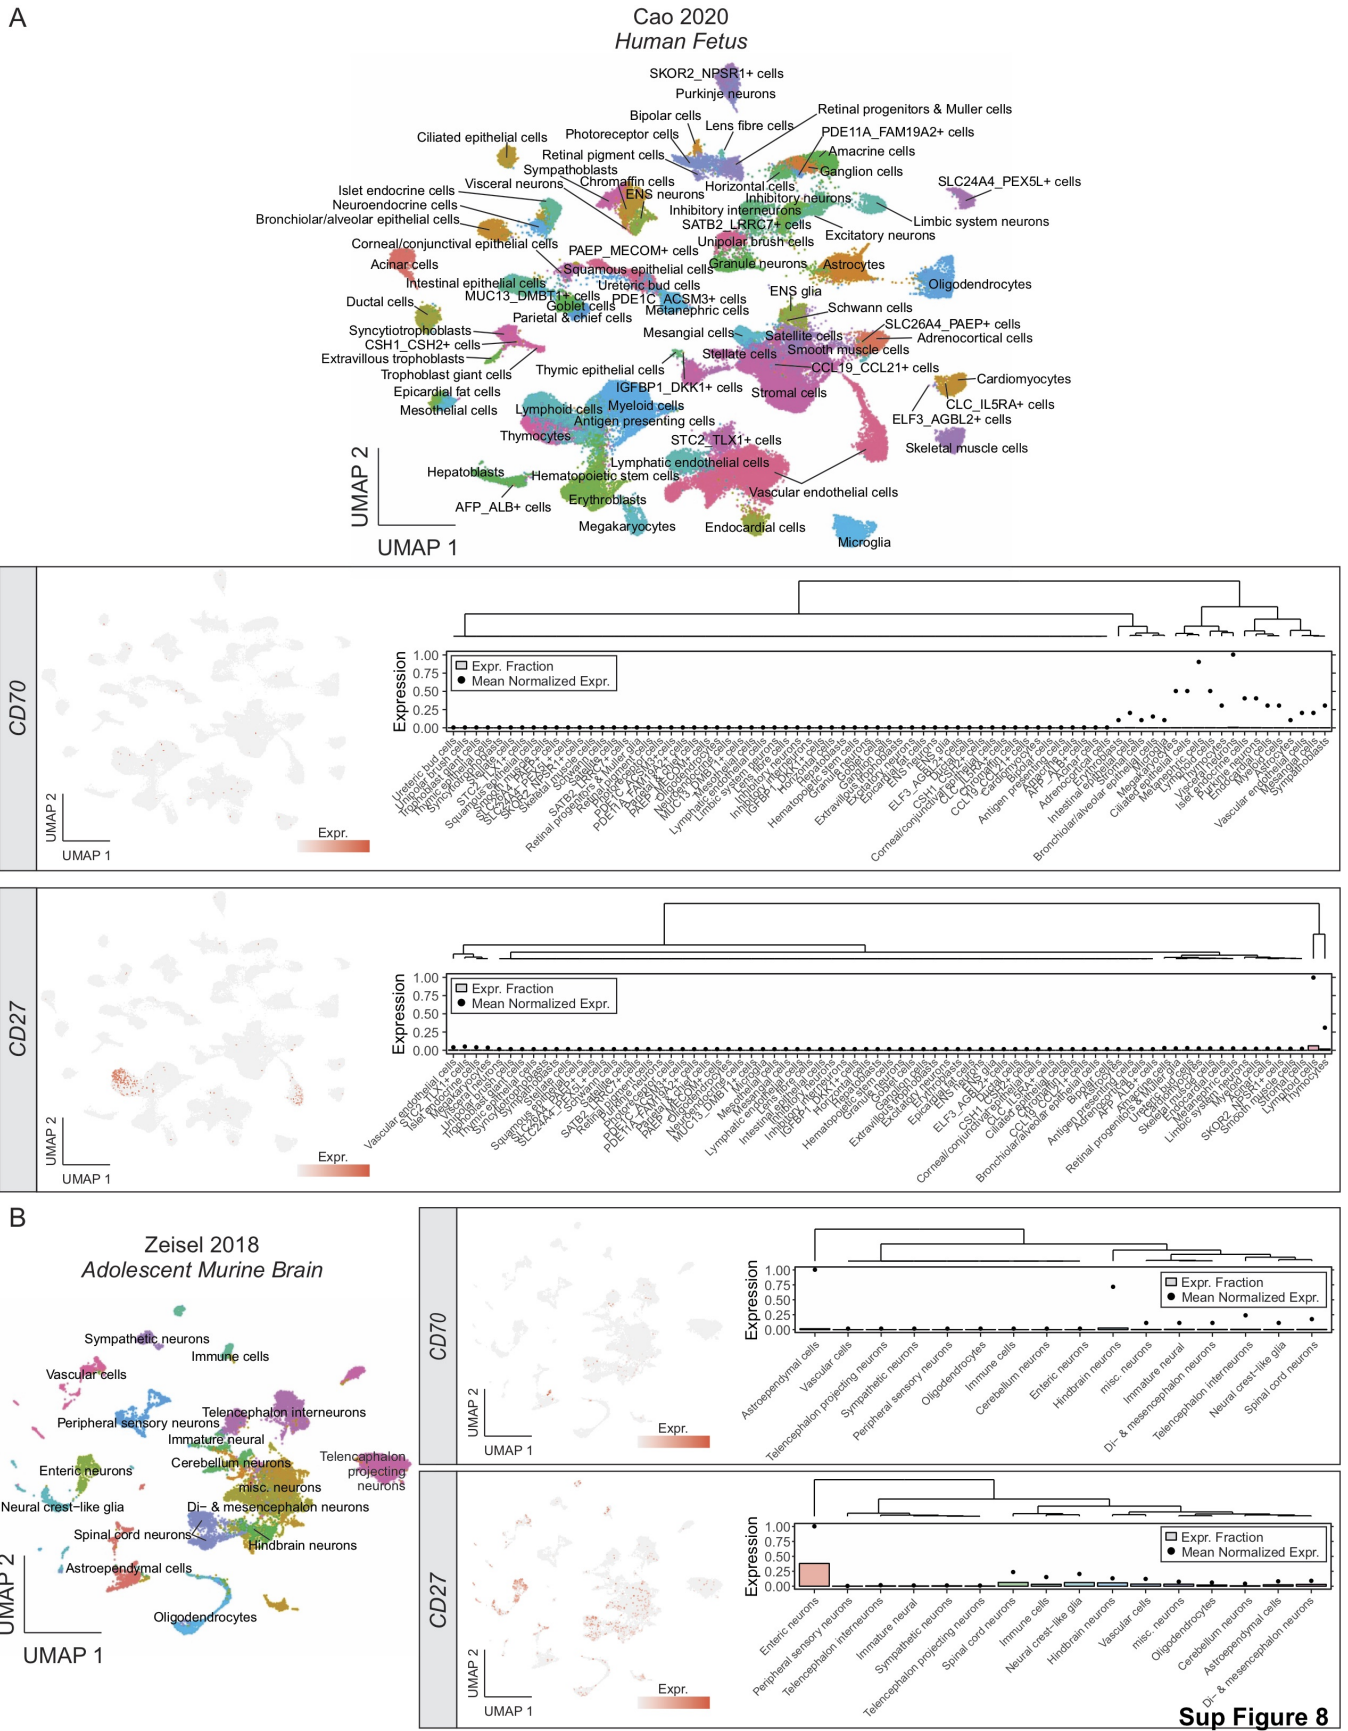

Supplement: jitc-2021-003289supp001.pdf [file jitc-2021-003289supp001.pdf]
